# Supplementary material
Source: PubMed Central journal article supplement (PMC3491524)
Supplement: 1209724109_pnas.201209724SI.pdf [file 1209724109_pnas.201209724SI.pdf]

# Supporting Information

Hall et al. 10.1073/pnas.1209724109

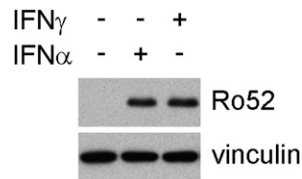

**Fig. S1.** Equivalent levels of Ro52 expression by IFN- $\alpha$  and IFN- $\gamma$ . Protein lysates from untreated HSGs or HSGs treated with IFN- $\alpha$  (1,000 U/mL) or IFN- $\gamma$  (50 ng/mL) for 24 h were analyzed by Western blotting. Ro52 was induced at equal levels by IFN- $\alpha$  and IFN- $\gamma$ . Vinculin is included as a loading control.

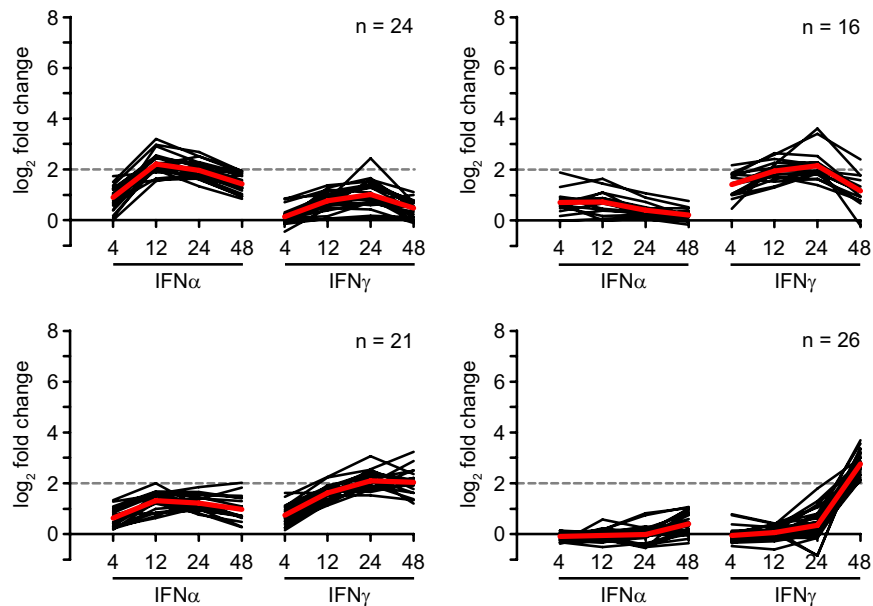

**Fig. S2.** Groups of transcripts with low differential expression. A total of 87 (20.9%) of the 416 IFN-induced transcripts was clustered by SOM into four groups. These groups contained transcripts with either low differential expression between IFN- $\alpha$  and IFN- $\gamma$ , or those that had an average induction by IFN- $\alpha$  or IFN- $\gamma$  above fourfold at only one time point. Individual transcripts are shown in black. Mean values for the group at each time point are shown in red. The y-axis represents log<sub>2</sub> fold change in expression relative to untreated cells. The dashed lines indicate a fourfold increase.



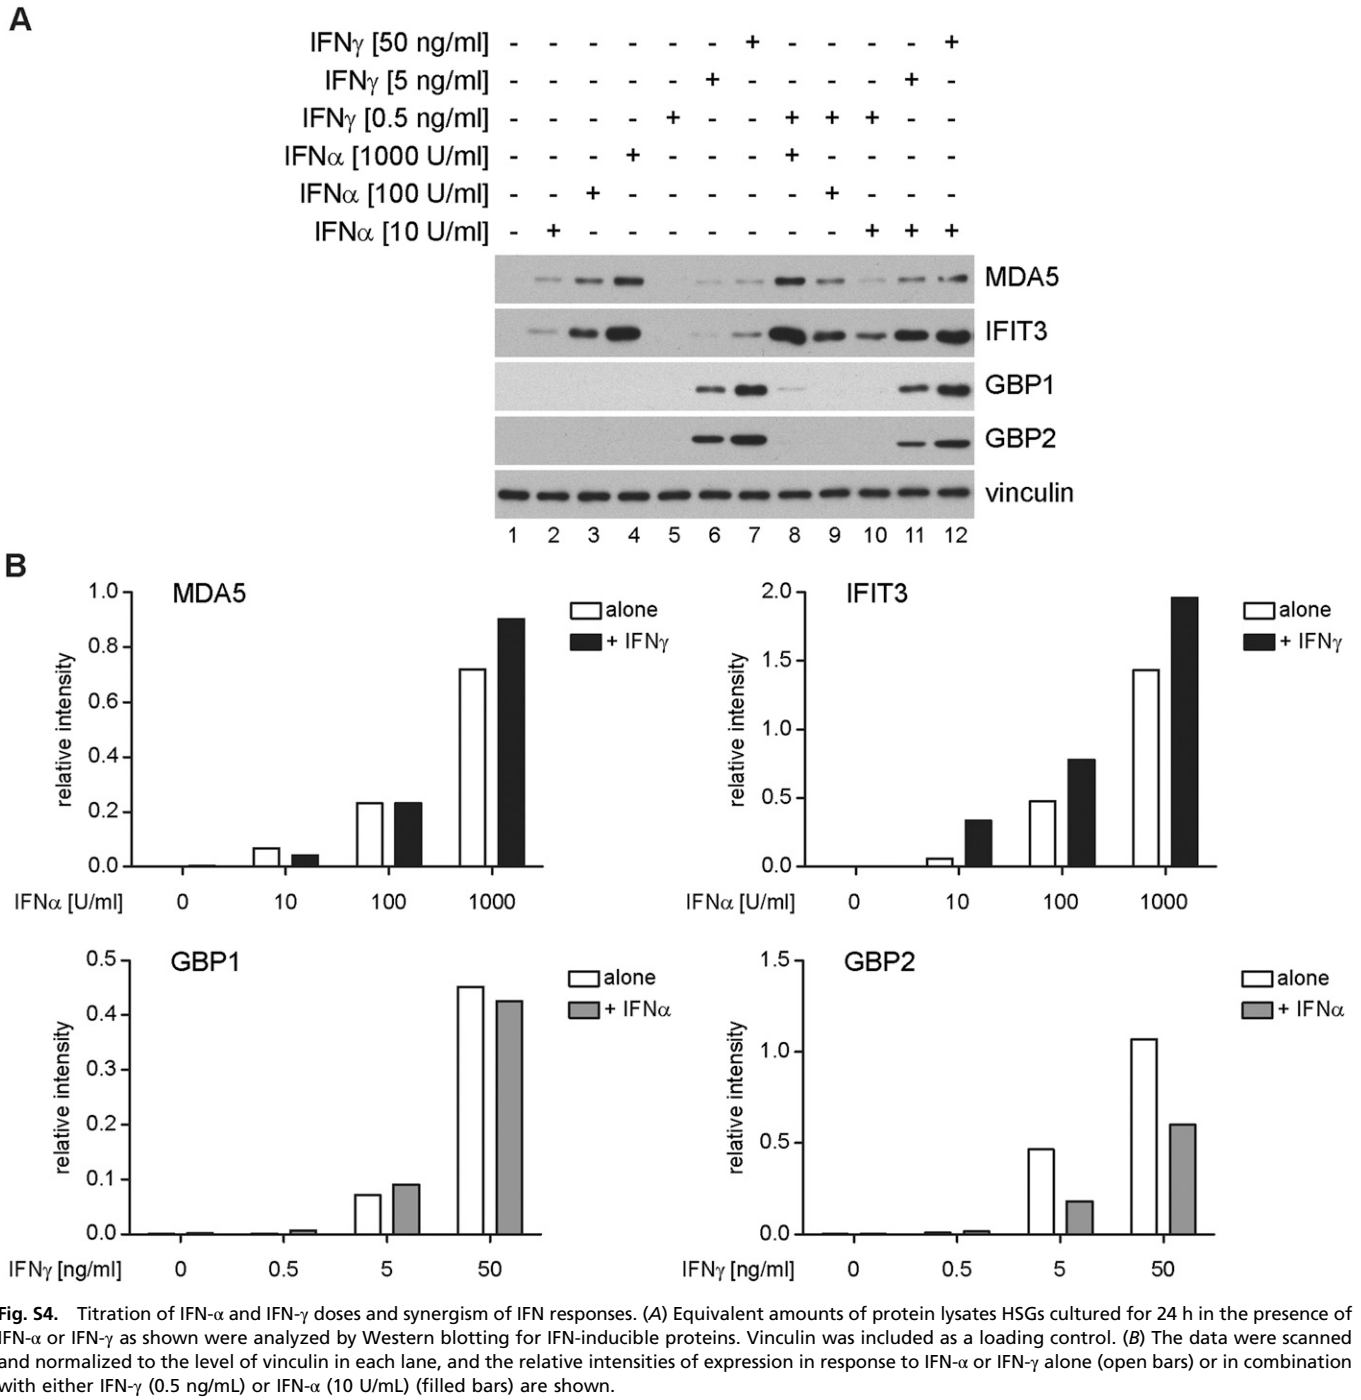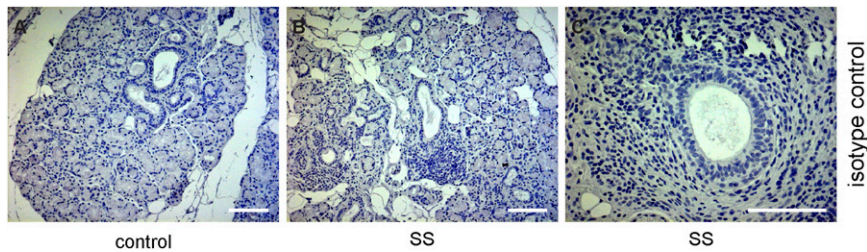

**Fig. 55.** Isotype control antibody staining in serial sections of minor salivary gland biopsies from the one control (A) and two SS patients (B and C) presented in Fig. 5. (Scale bars, 50  $\mu$ m.)

**Table S1. IFN-inducible genes, 4 h**

[Table S1](#)

**Table S2. IFN-inducible genes, 12 h**

[Table S2](#)

**Table S3. IFN-inducible genes, 24 h**

[Table S3](#)

**Table S4. IFN-inducible genes, 48 h**

[Table S4](#)

**Table S5. Lists of IFN- $\alpha$ - and IFN- $\gamma$ -responsive transcripts presented in Fig. 2**

[Table S5](#)
